# Supplementary material
Source: Research Square preprint supplement (doi:10.21203/rs.3.rs-9802621/v1)
Supplement: Supplementary file 1 [file 251439d2c18132197517c917.docx]

**sTable 2 Postoperative adjuvant therapy**

| **Variables** | **LG (n = 90)** | **RG (n = 90)** | ***P*** |
| --- | --- | --- | --- |
|
| AC, n(%) |  |  | 0.642 |
| No | 31 (34.44%) | 34 (37.78%) |  |
| Yes | 59 (65.56%) | 56 (62.22%) |  |
| Total cycle of AC, n(%) |  |  | 0.194 |
| 1-3 | 38 (42.22%) | 27 (30.00%) |  |
| 4-6 | 21 (23.33%) | 29 (32.22%) |  |
| AC regime, n(%) |  |  | 0.100 |
| SOX | 21 (23.33%) | 12 (13.33%) |  |
| FLOT | 15 (16.67%) | 17 (18.89%) |  |
| XELOX | 12 (13.33%) | 6 (6.67%) |  |
| DOS | 11 (12.22%) | 21 (23.33%) |  |
| AI, n(%) |  |  | 0.130 |
| No | 48 (53.33%) | 58 (64.44%) |  |
| Yes | 42 (46.67%) | 32 (35.56%) |  |
| AI regime, n(%) |  |  | 0.206 |
| Sintilimab | 25 (27.78%) | 13 (14.44%) |  |
| Nivolumab | 5 (5.56%) | 4 (4.44%) |  |
| Carilizumab | 5 (5.56%) | 4 (4.44%) |  |
| Others | 7 (7.78%) | 11 (12.22%) |  |

LG: Laparoscopic gastrectomy; RG: robotic gastrectomy; AC: Adjuvant chemotherapy; AI: Adjuvant immunotherapy.
