# Supplementary material
Source: Research Square preprint supplement (doi:10.21203/rs.3.rs-9802621/v1)
Supplement: Supplementary file 2 [file cd36df017029852c0b55813f.docx]

**sTable 1 immune-related adverse events (irAEs) of LG and RG group**

| **Variable** | **Before PSM** | | |  | **After PSM** | | |
| --- | --- | --- | --- | --- | --- | --- | --- |
| **LG (n = 196)** | **RG (n = 109)** |  |  | **LG (n = 90)** | **RG (n = 90)** |  |
| Skin toxicity |  |  |  |  |  |  |  |
| Rash | 15 (7.65%) | 12 (11.01%) |  |  | 8 (8.89%) | 9 (10.00%) |  |
| Gastrointestinal toxicity |  |  |  |  |  |  |  |
| Diarrhea | 7 (3.57%) | 2 (1.83%) |  |  | 5 (5.55%) | 1 (1.11%) |  |
| Colitis | 1 (0.51%) | 2 (1.83%) |  |  | 1 (1.11%) | 0 (0.00%) |  |
| Hepatotoxicity |  |  |  |  |  |  |  |
| Elevated transaminase | 2 (1.02%) | 2 (1.83%) |  |  | 2 (2.22%) | 2 (2.22%) |  |
| Elevated bilirubin | 1 (0.51%) | 1 (0.92%) |  |  | 0 (0.00%) | 1 (1.11%) |  |
| Endocrine toxicity |  |  |  |  |  |  |  |
| Hypothyroidism | 20 (10.20%) | 21 (19.27%) |  |  | 8 (8.89%) | 18 (20.00%) |  |
| Adrenal insufficiency | 1 (0.51%) | 0 (0.00%) |  |  | 0 (0.00%) | 0 (0.00%) |  |
| Pulmonary toxicity |  |  |  |  |  |  |  |
| Pneumonia | 37 (18.88%) | 18 (16.51%) |  |  | 15 (16.67%) | 14 (15.56%) |  |
| Cardiotoxicity |  |  |  |  |  |  |  |
| Myocarditis | 3 (1.53%) | 2 (1.83%) |  |  | 1 (1.11%) | 1 (1.11%) |  |

PSM: Propensity score matching; LG: Laparoscopic gastrectomy; RG: robotic gastrectomy.
