# Supplementary material
Source: Research Square preprint supplement (doi:10.21203/rs.3.rs-9802621/v1)
Supplement: Supplementary file 3 [file fa27d03fcc0640ce137c1b35.docx]

**sTable 3 Comparison of long- term outcomes of NAIC versus NAC.**

| **NAT** | **3-year DFS** | |  | **3-year OS** | |
| --- | --- | --- | --- | --- | --- |
| **LG** | **RG** | **LG** | **RG** |
| NAICa | 81.1% | 66.6% |  | 91.1% | 83.3% |
| NACb | 75.5% | 62.3% |  | 78.3% | 69.8% |

NAT: neoadjuvant therapy; DFS: Disease-free survival; OS: Overall survival; NAIC: Neoadjuvant immunochemotherapy; NAC: Neoadjuvant chemotherapy.

a: according to this study

b: according to our previous study: https://doi.org/10.1007/s00464-025-11626-3
